# Supplementary material
Source: PubMed Central journal article supplement (PMC1599894)

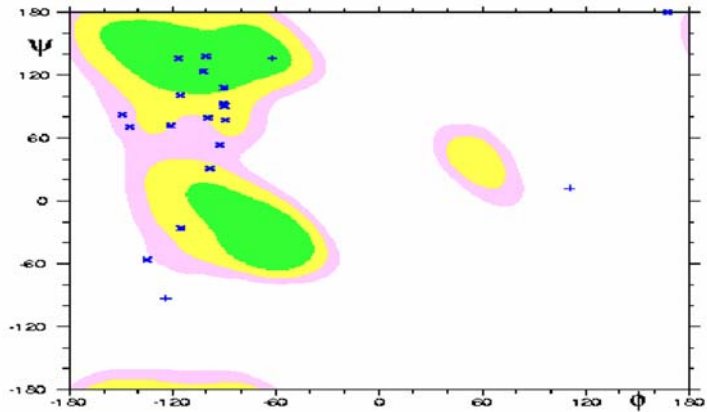

Supplement: pnas_0606312103_1.pdf [file pnas_0606312103_1.pdf]

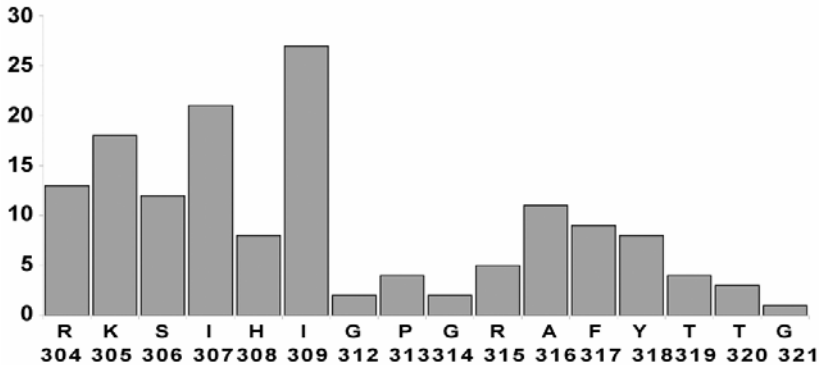

Supplement: pnas_0606312103_2.pdf [file pnas_0606312103_2.pdf]
